1 **OUTCOME AND ASSOCIATED FACTORS AMONG ROAD TRAFFIC ACCIDENT**  
2 **VICTIMS AT WOLAITA SODDO CHRISTIAN HOSPITAL, WOLAITA SODDO,**  
3 **SOUTH ETHIOPIA 2020,**

4 **INSTITUTION-BASED CROSS-SECTIONAL STUDY.**

5 ASRAT HIZKEL<sup>1</sup>, TEKLEMICHAEL GEBRU<sup>2</sup>, ESHETU YISIHAK<sup>3\*</sup>, DESTA MARKOS<sup>4</sup>,

6 <sup>1</sup>Soddo Christian hospital, orthopedic department

7 <sup>2</sup>Department of public health, College of Medicine and Health Sciences, Wolkite University

8 <sup>3</sup>Department of Midwifery, College of Medicine and Health Sciences, Arba Minch University

9 <sup>4</sup>School of Public Health, College of Medicine and Health Sciences, Arba Minch University

10 \*Corresponding author: Eshetu Yisihak, Department of Midwifery, College of Medicine and  
11 Health Sciences, Arba Minch University, Arba Minch, Ethiopia

12 Phone number: +251926266071/ +215966875486, gmail, eshetuyisihak@gmail.com,

13 Postal code: 21

14 **ABSTRACT**

15 **Background** In today's world road traffic accident victims are treated as a major epidemic of  
16 non-communicable disease. Road traffic accidents caused numerous family tragedies such as  
17 serious economic loss to the community and the death of young people. The problem is more  
18 severe in low and middle-income countries. In Ethiopia, the largest proportion of series injuries  
19 comes from road traffic accidents and become major causes of death in the emergency room.  
20 Despite this, only a little is known about treatment outcomes of road traffic accident victims and  
21 its associated factors in Ethiopia.

22 **Method** An institution-based Cross-sectional study design was conducted at Wolaita Soddo  
23 Christian hospital with a sample of 400 road traffic accidents. The medical record was selected

24 using a systematic sampling method. Data was entered using Epi-data version 4.1 and was  
25 exported to and analyzed using SPSS version 23. A multivariable logistic regression model was  
26 used to assess the association between the independent variables and dependent variables.

27 **RESULT** The overall death rate was 9.5%. Being out of hospital catchment area [AOR= 2.16,  
28 95% CI= (1.01-4.70)] presence of co-morbid condition [AOR= 6.77 95% CI= (2.44-18.81)] lack  
29 of first aid help [AOR= 2.77 95% CI= (1.17-6.52)] and severity of the injury [AOR= 3.85 95%  
30 CI= (1.50-9.89)] were found to be significantly associated with outcome of road traffic accident  
31 victims.

32 **Conclusion** The study shows that the death rate from road traffic accidents was high. Therefore,  
33 designing strategies to decrease death from road traffic accidents by giving great emphasis to  
34 road traffic accident victims with co-morbid conditions and severe injury and focusing on the  
35 availability and accessibility of pre-hospital care service.

36 **Keywords:** Outcome, road traffic accident, Wolaita Soddo Christian hospital, Ethiopia

37 **INTRODUCTION:** Road traffic accident (RTA) is a collision between two or more  
38 vehicles, between vehicles and pedestrians, between vehicles and fixed obstacles (1). In today's  
39 world, RTA is treated as a major epidemic of non-communicable disease and incurs permanent  
40 disability, through amputation, head injury, or spinal cord injury. This causes numerous family  
41 tragedies and represents a serious economic loss to the community and the death of young people  
42 (2).

43 A road traffic accident is a growing public health problem, being responsible for up to 50 million  
44 nonfatal injuries globally (1). The burden of road traffic deaths is disproportionately high among  
45 low and middle than high-income countries concerning the size of their populations and the  
46 number of motor vehicles in circulation with an average rate of 27.5 deaths per 100,000  
47 population, in low-income countries, and 8.3 deaths per 100,000 population in high -income  
48 countries(3). Ethiopia is one of the most affected countries by RTIs (4), with national RTAs  
49 fatality rate of 22% (5).

50 In Sub-Saharan Africa, there are challenges to delivering high-quality emergency medical  
51 services such as patient overload, poor integration with other health services, limited and

52 inefficient services, poor clinical documentation, and a shortage of physicians and necessary  
53 supplies (6-8).

54 Even though Ethiopia is a country with a low rate of motorization, The number of people killed  
55 and injured as a result of traffic accidents has been increasing and the country was experiencing a  
56 tremendous loss of life and property each year as one of the leading countries of the world with  
57 worst accident record(9). In Ethiopia, the largest proportion of series injuries comes from road  
58 traffic accidents and become major causes of death in the emergency room among trauma  
59 victims (10).

60 Factors associated with outcomes of road traffic accidents were severity of the crash, time to  
61 admission, sex, time to take care, residence, age of the patient, admission systolic blood pressure  
62 <90 mmHg, severe head injury (Glasgow Coma Score = 3-8), time of receiving medical attention  
63 after injury, delayed presentation, had a comorbid condition, receiving first aid service (2, 11-  
64 17). In Ethiopia, outcomes and associated hospital factors were a little addressed area despite the  
65 increasing death secondary to RTAs. So, the aim of this study which assesses outcomes and  
66 associated factors among road traffic accident victims at Wolaita Soddo Christian hospital, south  
67 Ethiopia, attempts to fill this information gap.

## 68 **METHODS AND MATERIALS,**

### 69 **Study Area,**

70 Soddo town is the capital city of the Wolaita zone, which is one of 14 zones in the southern  
71 region of Ethiopia. Soddo town is 330 km far from Addis Ababa, the capital city of Ethiopia.  
72 Christian hospital is one of the two hospitals in Soddo town that gives trauma management  
73 at the highest level. The hospital has access to specialist and nursing care including  
74 emergency surgery, trauma surgery, critical care, neurosurgery, orthopedic surgery,  
75 anesthesiology, and radiology, as well as highly sophisticated surgical and diagnostic  
76 equipment.

### 77 **Study Period,**

78 May 10/2020 up to May 30/2020

### 79 **Study Design,**

80 Institution-based Cross-sectional study design

### 81 **Source population,**

82 All medical records of RTA victims admitted at Wolaita Soddo Christian hospital

### 83 **Study population,**

84 All medical records of RTA victims admitted at Wolaita Soddo Christian hospital from  
85 January 1, 2018, to December 31, 2019.

### 86 **Inclusion criteria,**

87 All RTA victims admitted from January 1, 2018, to December 31, 2019, at the emergency  
88 department of Wolaita Soddo Christian hospital were included in the study based on the sample  
89 size.

### 90 **Exclusion criteria,**

91 Those RTA victims' deaths happened during arrival, immediate referral, incomplete cards  
92 (missing very important variable) were excluded from the study.

93           **Sample size determination,**

94           The sample size was determined by using single population proportion formula by  
95           considering the following assumptions: proportions of outcome from similar study 9.4%,  
96           95% confidence level of certainty, 3% marginal error (we decreased the margin of error to  
97           increase sample size), and 10% non-response rate. The final sample size was 400.

98           **Sampling Technique,**

99           Using systematic random sampling, all RTA victims registered from January 1, 2018, to  
100           December 31, 2019, at Christian hospital were listed based on the sequence of their card  
101           numbers. Study units were selected by calculating sampling interval (K) from the sampling  
102           frame, N and sample size n ( $k=N/n$ ), interval ( $k=5$ ). The first number to start was selected  
103           randomly.

104           **Study Variables,**

105           **Dependent variable,**

106           Outcome of road traffic accident / death /

107           **Independent variable,**

108           Socio demographic characteristic, characteristics of RTA victims during admission to emergency  
109           department, Clinical characteristics at admission

110 **Data collection instrument/ abstraction format/**,

111 The data abstraction format was developed in reference to the objective of the study. The  
112 data abstraction format was prepared in the English language.

113 **Data collection process,**

114 The data for the study was review from routinely registered client medical records and  
115 emergency department registration books. The data was collected by trained clinical nurses  
116 under the supervision of investigators using a data abstraction format according to the  
117 inclusion criteria, the format contains questions regarding; socio-demographic,  
118 characteristics of RTA victims during admission to emergency department, clinical  
119 characteristics at admission, and treatment outcome.

120 **Data Quality Control,**

121 To ensure the data quality, a pretest was conducted on 5% of the total sample. Reliabilities  
122 of the tool were checked. The data cleaning was done by running frequency and sorting by  
123 SPSS version 23.

124 **Data Analysis,**

125 The collected data were entered into Epi data version 4.1 and analyzed using SPSS version 23.  
126 Frequency distribution, percentage calculation, means, and standard division were used to  
127 describe the variable. Those variables found to have a p-value <0.25 by binary logistic regression  
128 had been taken to multivariable logistic regression. Variables having p- values < 0.05 in the  
129 multiple logistic regression models were considered as significantly associated with the  
130 dependent variable.

131 **RESULT**

132 **Socio- Demographic Characteristics,**

133 Of 400 RTA victims admitted to Soddo Christian hospital 232 (58%) were male.

134 The patients' ages ranged from 1 to 85 years with the mean and standard deviations of 31.21  
135 and  $\pm 15$  years respectively. About 308(77%) of RTA victims were from Wolaita while  
136 92(23%) were out of Wolaita (Table 1).

137 **Table 1:** Distribution of demographic characteristics of RTA victims at Soddo Christian  
138 hospitals from January 1, 2018 -December 30, 2020

| Variable  | Category       | Frequency | Percentage (%) |
|-----------|----------------|-----------|----------------|
| Age       | <15            | 59        | 14.8           |
|           | 15-19          | 93        | 23.3           |
|           | 20-30          | 116       | 29.0           |
|           | 31-50          | 62        | 15.5           |
|           | >50            | 70        | 17.5           |
| Residence | Wolaita        | 308       | 77.0           |
|           | out of wolaita | 92        | 23.0           |
| Sex       | Male           | 232       | 58.0           |
|           | Female         | 168       | 42.0           |

139

#### 140 **Characteristics of RTA victims during admission to Emergency Department,**

141 About 149(37.3%) of the respondents come to the hospital within the first 6 hours of the accident  
142 while 38(9.5%) come to the hospital after 24 hours of the accident. More than half 240(60%) of  
143 the respondent arrived by ambulance while 10% of them arrived by carrying or walking. Only  
144 160(40%) of the respondent had been given first aid before their arrival at Soddo Christian  
145 Hospital. About 202(50.5%) victims arrive at ED less than 24hr after injury and in 126(31.5%),  
146 54 (13.5 %), 18 (9.5%) of the victims taken 1-3 days, 4-7 days, and beyond week respectively  
147 (Table 2).

148 **Table 2:** Characteristics of RTA victims during admission to the emergency department at  
149 Soddo Christian hospitals from January 1, 2018 -December 30, 2019

| Variable                                   | Category          | Frequency | Percentage (%) |
|--------------------------------------------|-------------------|-----------|----------------|
| Time of arrival to hospital after accident | 0hour-6hour       | 149       | 37.3           |
|                                            | 6 hour - 12 hour  | 102       | 25.5           |
|                                            | 12 hour - 18 hour | 73        | 18.3           |
|                                            | 18 hour -24 hour  | 38        | 9.5            |

It is made available under a [CC-BY 4.0 International license](https://creativecommons.org/licenses/by/4.0/) .

|                                       |                                                 |     |       |
|---------------------------------------|-------------------------------------------------|-----|-------|
|                                       | after 24 hour                                   | 38  | 9.5   |
| Mode arrival to hospital              | Ambulance                                       | 240 | 60.0  |
|                                       | Taxi                                            | 120 | 30.0  |
|                                       | Other /carrying, walking/                       | 40  | 10.0  |
| First aid given                       | Yes                                             | 160 | 40.0  |
|                                       | No                                              | 240 | 60.0  |
| Time gap between accident and arrival | <24 hour                                        | 202 | 50.5  |
|                                       | 1-3 days                                        | 126 | 31.5  |
|                                       | 4-7 days                                        | 54  | 13.5  |
|                                       | > 1 week                                        | 18  | 4.5   |
| Source of referrals                   | Governmental hospitals in Wolaita Soddo         |     | 31.75 |
|                                       | Governmental hospitals out of Wolaita Soddo     |     | 10.5  |
|                                       | Private hospitals/clinics/ in Wolaita Soddo     |     | 21    |
|                                       | Private hospitals/clinics/ out of Wolaita Soddo |     | 10.5  |
|                                       | Health center                                   |     | 15.75 |
|                                       | Self-referral                                   |     | 10.5  |



151 **Clinical characteristics of RTA victims at admission,**

152 Among the respondents admitted to Soddo Christian frequently hospital injured body  
 153 regions were lower extremity 75(18.5%) and abdominal area 69(17.3%). For the remaining  
 154 RTA Victims, the injury involves the upper extremity, chest, pelvic, head, and other: 67  
 155 (16.8%), 44 (11%), 50 (12.5%), 62 (15.5%), and 33 (8.3%) of the victims correspondingly.  
 156 When we look at the level of severity 203 (50.8%) were mild, 82 (20.5%) were moderate, 54  
 157 (13.5%) severe pain levels were had and 61 (15.3 %) victims were classified as needing  
 158 immediate intervention. Were as 160 (40%) RTA victims were receiving first- aid and 240  
 159 (60%) RTA victims did not receive the service in the present study, in addition, 35(8.8%) of  
 160 RTA, Victims admitted to ED had co-morbid conditions (Table 3).

161 **Table 3:** Clinical characteristics of RTA victims during admission at Soddo Christian hospital  
 162 from January 1, 2018 -December 30, 2019

| Variable                 | Category                                          | frequency | Percentage (%) |
|--------------------------|---------------------------------------------------|-----------|----------------|
| have co morbid condition | Yes                                               | 35        | 8.8            |
|                          | No                                                | 365       | 91.3           |
| First aid given          | Yes                                               | 160       | 40.0           |
|                          | No                                                | 240       | 60.0           |
| Level of severity        | Green color coding                                | 203       | 50.8           |
|                          | Yellow color coding                               | 82        | 20.5           |
|                          | Orange color coding                               | 54        | 13.5           |
|                          | Red color coding                                  | 61        | 15.3           |
| Site of injury           | Head injury                                       | 62        | 15.5           |
|                          | Upper extremity                                   | 67        | 16.8           |
|                          | Chest injury                                      | 44        | 11.0           |
|                          | Abdominal injury                                  | 69        | 17.3           |
|                          | Pelvic injury                                     | 50        | 12.5           |
|                          | Lower extremity injury                            | 75        | 18.8           |
|                          | Other /multiple organ injury ,spinal cord injury/ | 33        | 8.3            |

164 **Outcomes of road traffic accident victims at Christian hospital,**

165 Of the total RTA victims, about 362 (90.5 %) were discharged with medical advice, and 38  
 166 (9.5%) died during the course of the treatment (Figure1).

167 **Factors associated with RTA related death,**

168 Road traffic accident victims those lives out of Wolaita (far), were 2.16 times more likely to die,  
 169 (AOR=2.16: 95% CI: 1.01-4.70) than RTA victims who came to the Soddo Christian hospital  
 170 from the Wolaita area(near). RTA victims those, had co-morbid conditions, were 6.77 times  
 171 more likely to die than RTA victims who had not co-morbid conditions (AOR: 6.77; 95% CI  
 172 (2.44-18.81). According to the study, RTA victims who had not received first aid was 3 times  
 173 more likely to die than the respondent who had received first aid (AOR: 2.77; 95% CI (1.17-  
 174 6.52). RTA victims who had been severely injured were more likely to die than those who had  
 175 been affected slightly (AOR: 3.85; 95% CI (1.50-9.89) (Table 4).

176 **Table 4:** Factors associated with death among RTA victims during admission at Soddo Christian  
 177 hospitals from January 1, 2018 -December 30, 2019

| Variables            | Category       | Treatment outcome |      | COR(95%CI)       | AOR(95%CI)      | P-value |
|----------------------|----------------|-------------------|------|------------------|-----------------|---------|
|                      |                | Alive             | Dead |                  |                 |         |
| Age                  | <15            | 55                | 4    | 1                | 1               | 0.081   |
|                      | 15-19          | 85                | 8    | 1.29(0.37-4.50)  | 1.03(0.28-3.83) | 0.968   |
|                      | 20-30          | 110               | 6    | 0.75(0.20-2.77)  | 0.41(0.10-1.68) | 0.214   |
|                      | 31-50          | 55                | 7    | 1.75(0.49-6.32)  | 1.03(0.25-4.23) | 0.967   |
|                      | >50            | 57                | 13   | 3.14(0.96-10.21) | 2.19(0.62-7.74) | 0.223   |
| place of residence   | Wolaita        | 285               | 23   | 1                | 1               |         |
|                      | out of Wolaita | 77                | 15   | 2.41(1.20-4.85)  | 2.16(1.01-4.70) | 0.049   |
| Time gap between the | <24 hour       | 177               | 25   | 1                | 1               |         |
|                      | >24            | 185               | 13   | 2.01(1.00-4.05)  | 0.50(0.23-1.08) | 0.079   |
| First aid given      | Yes            | 152               | 8    | 1                | 1               |         |
|                      | No             | 210               | 30   | 2.71(1.21-6.09)  | 2.77(1.17-6.52) | 0.020   |

|                     |                         |           |           |                         |                         |              |
|---------------------|-------------------------|-----------|-----------|-------------------------|-------------------------|--------------|
| Level of severity   | Green color coding      | 190       | 13        | 1                       | 1                       | 0.044        |
|                     | Yellow color coding     | 74        | 8         | 1.58(0.63-3.97)         | 1.99(0.73-5.42)         | 0.179        |
|                     | Orange color coding     | 49        | 5         | 1.49(0.51-4.38)         | 1.43(0.43-4.74)         | 0.561        |
|                     | <b>Red color coding</b> | <b>49</b> | <b>12</b> | <b>3.58(1.54-8.33)</b>  | <b>3.85(1.50-9.89)</b>  | <b>0.005</b> |
| co morbid condition | <b>Yes</b>              | <b>25</b> | <b>10</b> | <b>4.81(2.10-11.02)</b> | <b>6.77(2.44-18.81)</b> | <b>0.000</b> |
|                     | No                      | 337       | 28        | 1                       | 1                       |              |

178

## 179 **Discussion,**

180 The study revealed that the outcome of 9.5% of RTA victims admitted to Soddo Christian  
 181 hospitals during the study period was death. The finding of this study is in line with a study from  
 182 Dilchora referral hospital, Dire Dawa (9.4%) (18).

183 The death outcome observed in this study was higher as compared to the studies in hospitals in  
 184 Ahmedabad city, India (1.33%) (19) and (3.9%) in Iran (20), Zewuditu memorial hospital (1%)  
 185 (21), and Wolaita Zone, SNNPR 6 % (22). This might be due to the studies set up was trauma  
 186 treatment centers and many victims were linked from another health facility, due to this patient  
 187 overload and life-treating cases may lead to higher deaths.

188 However, it is lower than a report from a previous study conducted (13.1%) at the tertiary care  
 189 center, India (23). It might be due that Soddo Christian hospital mainly works on orthopedic  
 190 surgery in that trauma management was given at the highest levels in the study area.

191 The study result showed that there was no significant association between sex, age, source of  
 192 referral, mode of arrival, time of arrival, and site of injury with outcome /death / of RTA victims

193 in Soddo Christian hospital but there was a significant association between residence, presence  
194 of first aid, presence of the co-morbid condition, and severity of the injury and treatment  
195 outcome /death / of RTA victims in Soddo Christian hospital.

196 Road traffic accident victims who live out of Wolaita were more likely to die than RTA  
197 victims who came to the hospital from the Wolaita area. This result is in line with the studies  
198 done in North Ghana, the death rate was 2 times increased from those coming from a rural  
199 area or out of hospital catchment (11, 12). This might be justifying the fact that when the  
200 victim comes far from the hospital time to admission was higher in comparison with those  
201 who come from near to hospital or treatment center this in turn increases the severity of the  
202 injury and poor outcome of RTA victims.

203 RTA victims those, had co-morbid conditions, were more likely to die than RTA victims  
204 who had no co-morbid conditions. The previous study was done in a tertiary health care  
205 delivery institute in western Nepal (24) also supports the finding as co-morbid conditions  
206 were significantly associated with a high death rate. Co-morbid conditions by themselves  
207 suppress the immunity and hinder recovery might be lead to death.

208 According to the study, RTA victims who had not received first aid were more likely to die. It is  
209 supported by a study conducted in tertiary care center Luck now, India, it indicates the  
210 proportion of death was significantly higher in those patients who got first aid in 30 minutes to  
211 60 minutes as compared to those patients who got it in less than 30 minutes (19). This might be  
212 justified, not reserving first aid were decreased the chance of survival by complicated the case.

213 RTA victims who were at a red color-coding level of severity (severe pain level and victims with  
214 immediate intervention need injury) were more likely to die. The finding was similar to the study  
215 done in Iran; those RTA victims severely injured were more likely to die (20). A 5- year  
216 retrospective study done in India, also stated that the severity of injuries causes road traffic death  
217 (19). This might be justifying because physiological, anatomical, and psychological trauma  
218 caused by RTA leads to an unsatisfactory response for treatment modality.

### 219 **Conclusion,**

220 The study revealed among a hundred RTA victims' approximately ten deaths was happen.  
221 Co-morbid condition, residence, the severity of the injury, not received first aid service were  
222 statistically significant factors that increase the death of RTA victims. It is better if the health  
223 care providers emphasize those RTA victims with co-morbid conditions and severe injury  
224 and Wolaita zone health bureau and federal ministry of health focusing on the availability  
225 and accessibility of pre-hospital care service.

### 226 **ABBREVIATIONS AND ACRONYMS**

|     |             |                                        |
|-----|-------------|----------------------------------------|
| 227 | <b>CI</b>   | Confidence Interval                    |
| 228 | <b>AOR</b>  | Adjusted Odd Ratio                     |
| 229 | <b>ED</b>   | Emergency Department                   |
| 230 | <b>ICU</b>  | Intensive Care Unit                    |
| 231 | <b>MEWS</b> | Modified Early Warning Score           |
| 232 | <b>RTA</b>  | Road Traffic Accident                  |
| 233 | <b>RTC</b>  | Road Traffic Crash                     |
| 234 | <b>RTI</b>  | Road Traffic injury                    |
| 235 | <b>SPSS</b> | Statistical Package for Social Science |

236 **Availability of data and materials;**

237 The dataset supporting the conclusions of this article is included within the article.

238 **Declaration of interests**

239 We declare no competing interests.

240 **ACKNOWLEDGMENTS**

241 The authors thank Wolaita Soddo Christian hospital and Wolaita zone health bureau for their  
242 cooperation by giving us important information, as well as data collectors.

243 **Funding**

244 The research was conducted fully independent from the study sponsor.

245 **Authors' contributions**

246 **Conceptualization:** Asrat Hiskel, Eshetu Yisihak, Desta Maskos, Teklemichael Gebru

247 **Data curation:** Asrat Hiskel, Eshetu Yisihak, Desta Maskos, Teklemichael Gebru

248 **Formal analysis:** Asrat Hiskel, Eshetu Yisihak, Desta Maskos, Teklemichael Gebru

249 **Funding acquisition:** Asrat Hiskel, Eshetu Yisihak, Desta Maskos, Teklemichael Gebru

250 **Methodology:** Asrat Hiskel, Eshetu Yisihak, Desta Maskos, Teklemichael Gebru

251 **Project administration:** Asrat Hiskel, Eshetu Yisihak, Desta Maskos, Teklemichael Gebru

252 **Resources:** Asrat Hiskel, Eshetu Yisihak, Desta Maskos, Teklemichael Gebru

253 **Software:** Asrat Hiskel, Eshetu Yisihak, Desta Maskos, Teklemichael Gebru

254 **References**

255 1. Peden M, Scurfield R, Sleet D, Hyder AA, Mathers C, Jarawan E, et al. World report on  
256 road traffic injury prevention: World Health Organization; 2004.

- 257 2. WHO. Global status report on road safety 2002.Supporting a decade of action. Geneva.  
258 2017.
- 259 3. Global status report on road safety. World Health Organization, 2018.
- 260 4. World Health Organization. Global status report on road safety: time for action. Geneva,  
261 Switzerland: WHO, 2009. <http://www.un.org/ar/roadsafety/pdf/roadsafetyreport.pdf> May 2016.
- 262 5. Getu ST, Washington, S., & King, M. J. . Characteristics of police- reported road traffic  
263 crashes in Ethiopia over a six year period. centre for accident research and road safety  
264 Queensland (CARRS- Q), Queensland university of technology. retrieved from:  
265 eprints.qut.edu.au/63884. 2013.
- 266 6. Mac Farlane C vLC, Kloeck W. . International EMS systems: South Africa-past, present  
267 and future. Resuscitation. 2005;;64: 145-148.
- 268 7. House D R NSL, Yusi Y, Rusyniak D E. . Descriptive study of an emer-gency centre in  
269 Western Kenya: challenges and opportunities. African J Emerg Med 2014;;4: 19-24.
- 270 8. Calvello E RT, Hirshon J M, et al. . Emergency care in sub-Saharan Africa: results of a  
271 consensus conference. African J Emerg Med. 2013; ;3: 42-48.
- 272 9. Abegaz T, Berhane Y, Worku A, Assrat A. Effectiveness of an improved road safety  
273 policy in Ethiopia: an interrupted time series study. BMC public health. 2014;14(1):539.
- 274 10. RT A. Traffic Safety activity in Ethiopia report fiscal year 2016/2017. 2017.
- 275 11. Asefa F, Assefa D, Tesfaye G. Magnitude of, trends in, and associated factors of road  
276 traffic collision in central Ethiopia. BMC public health. 2014;14(1):1072.
- 277 12. Ayaga Bawah pw DK, George Wak,James F,Philips Abrham Oduro. Road traffic fatality  
278 -neglected epidemic in rular north Ghana:evidenc from the Navrongo demographic survellance  
279 system. 2016.
- 280 13. Tiruneh BT, Dachew BA, Biffu BB. Incidence of road traffic injury and associated  
281 factors among patients visiting the emergency department of Tikur Anbessa specialized teaching  
282 hospital, Addis Ababa, Ethiopia. Emergency medicine international. 2014;2014.
- 283 14. Sherafati F HRE, Afkar A, Gholampoor-Sigaroodi R, Sirusbakht S. Risk factors of road  
284 traffic accidents associated mortality in northern Iran; A single center experience utilizing oaxaca  
285 blinder decomposition. Bull Emerg Trauma 2017;;5(2):116-121.

- 286 15. Chalya PL, Mabula JB, Dass RM, Mbelenge N, Ngayomela IH, Chandika AB, et al.  
287 Injury characteristics and outcome of road traffic crash victims at Bugando Medical Centre in  
288 Northwestern Tanzania. *Journal of trauma management & outcomes*. 2012;6(1):1.
- 289 16. Boniface R, Museru L, Kiloloma O, Munthali V. Factors associated with road traffic  
290 injuries in Tanzania. *Pan African medical journal*. 2016;23(1).
- 291 17. Seid M, Azazh A, Enquselassie F, Yisma E. Injury characteristics and outcome of road  
292 traffic accident among victims at Adult Emergency Department of Tikur Anbessa specialized  
293 hospital, Addis Ababa, Ethiopia: a prospective hospital based study. *BMC emergency medicine*.  
294 2015;15(1):10.
- 295 18. Negesa L, Mohammed J. Assessment of magnitude and treatment outcome of Road  
296 traffic accident from January 2013-January 2015 in Dilchora Referral hospital, Diredawa eastern  
297 Ethiopia. *World Journal of Surgical Research*. 2017;6(1).
- 298 19. Dobranskyte-Niskota A, Perujo A, Pregl M. Indicators to assess sustainability of  
299 transport activities. European Commission, Joint Research Centre. 2007.
- 300 20. Sherafati F, Rad EH, Afkar A, Gholampoor-Sigaroodi R, Sirusbakht S. Risk factors of  
301 road traffic accidents associated mortality in northern iran; a single center experience utilizing  
302 oxaca blinder decomposition. *Bulletin of Emergency & Trauma*. 2017;5(2):116.
- 303 21. Getachew S, Ali E, Tayler-Smith K, Hedt-Gauthier B, Silkondez W, Abebe D, et al. The  
304 burden of road traffic injuries in an emergency department in Addis Ababa, Ethiopia. *Public  
305 Health Action*. 2016;6(2):66-71.
- 306 22. Hailemichael F, Suleiman M, Pauolos W. Magnitude and outcomes of road traffic  
307 accidents at Hospitals in Wolaita Zone, SNNPR, Ethiopia. *BMC research notes*. 2015;8(1):135.
- 308 23. Chauhan A, Ahmed N, Singh JV, Singh VK, Singh A, Kumar S. Disability and mortality  
309 following road traffic injury: a follow-up study from a tertiary care centre of India. *International  
310 Journal Of Community Medicine And Public Health*. 2017;4(12):4712-7.
- 311 24. Mishra B, Sinha ND, Sukhla S, Sinha A. Epidemiological study of road traffic accident  
312 cases from Western Nepal. *Indian journal of community medicine: official publication of Indian  
313 Association of Preventive & Social Medicine*. 2010;35(1):115.
